# Supplementary material for: Synthesis of phycocyanobilin in mammalian cells
Source: Royal Society of Chemistry journal article supplement (doi:10.1039/c3cc45065a), 2013-01-01
Supplement: c3cc45065a.pdf [file c3cc45065a.pdf]

# Synthesis of Phycocyanobilin in Mammalian Cells

Konrad Müller,<sup>a</sup> Raphael Engesser,<sup>b,c</sup> Jens Timmer,<sup>b,c,d,e</sup> Ferenc Nagy,<sup>a,f</sup> Matias D. Zurbriggen<sup>a</sup> & Wilfried Weber<sup>a,c,d</sup>

<sup>a</sup> Faculty of Biology, University of Freiburg, Schänzlestrasse 1, 79104 Freiburg, Germany

<sup>b</sup> Physics Department, University of Freiburg, Hermann-Herder-Str. 3, 79104 Freiburg, Germany

<sup>c</sup> BIOS Centre for Biological Signalling Studies, University of Freiburg, Schänzlestrasse 18, 79104 Freiburg, Germany

<sup>d</sup> Freiburg Centre for Biosystems Analysis (ZBSA), University of Freiburg, Habsburgerstrasse 49, 79104 Freiburg, Germany

<sup>e</sup> Freiburg Institute for Advanced Studies (FRIAS), University of Freiburg, Albertstrasse 19, 79104 Freiburg, Germany

<sup>f</sup> Biological Research Centre, Institute of Plant Biology, 6726 Szeged, Hungary

|                               |                                                                                                                                                                                    |
|-------------------------------|------------------------------------------------------------------------------------------------------------------------------------------------------------------------------------|
| <b>Materials and Methods</b>  | DNA cloning<br>Cell culture and transfection<br>Lentiviral particle production<br>Illumination conditions<br>Reporter gene and biliverdin reductase assay<br>Mathematical modeling |
| <b>Supplementary Figure 1</b> | Quantification of PCB biosynthesis                                                                                                                                                 |
| <b>Supplementary Table 1</b>  | Expression vectors and oligonucleotides designed and used in this study                                                                                                            |
| <b>Supplementary Table 2</b>  | Nucleotide sequences of chemically synthesized DNA                                                                                                                                 |
| <b>Supplementary Table 3</b>  | Fitted parameters obtained by a maximum likelihood estimation                                                                                                                      |

## Materials and Methods

**DNA cloning.** The construction of expression vectors is detailed in Supplementary Table 1.

**Cell culture and transfection.** Chinese hamster ovary cells (CHO-K1, ATCC CCL 61) were cultivated in HTS medium (Cell Culture Technologies) supplemented with 10% fetal bovine serum (FBS) (PAN, cat. no. P30-3602, batch no. P101003TC), and 2 mM L-glutamine (Sigma). The medium was supplemented with 100 U/ml of penicillin and 0.1 mg/ml of streptomycin (PAN). Cells were transfected, using a polyethylene-imine-based method (PEI, linear, MW: 25 kDa) (Polyscience). In brief, 1 mg/ml PEI solution in H<sub>2</sub>O was adjusted to pH 7.0 with HCl, sterile filtered and stored at -80 °C in aliquots. 70.000 cells were seeded per well of a 24-well plate and cultivated overnight. Aliquots of 0.75 µg of DNA were diluted in 50 µl of OptiMEM (Invitrogen) and mixed with 2.5 µl of PEI solution in 50 µl of OptiMEM under vortexing (amounts scaled to one well). After 15 min incubation at room temperature, the precipitate was added to the cells. For other plate formats, the cell number and amount of reagents were scaled up according to the growth area. The culture medium was replaced 5 h after the transfection. Unless indicates, all plasmids were transfected in equal amounts (w:w) and only the bicistronic expression cassette for the PCB-biosynthesis enzymes on pKM087 was transfected in 2-fold excess (w:w).

**Lentiviral particle production.** For production of replication-incompetent, self-inactivating (SIN) HIV-1-based lentiviral particles, solution I (100 µl 2x HBS (280 mM NaCl, 100 mM Hepes, 1.5 mM Na<sub>2</sub>HPO<sub>4</sub>, pH 7.1)) was mixed with solution II (50 µl 0.5 M CaCl<sub>2</sub> and 50 µl H<sub>2</sub>O, containing 1 µg pLTR-G, 1 µg pCD/NL-BH\* and 2 µg of the desired transgene-encoding lentiviral expression vector). Following 15 min incubation at room temperature the DNA-calcium-phosphate precipitates were applied with 25 µM chloroquine to 500,000 HEK293-T cells<sup>1</sup> per well of a 6-well plate, seeded 24 h before transfection in Advanced D-MEM (Gibco, cat. no.: 12491-015) supplemented with 2 % (v/v) FBS, 0.01 M cholesterol, 0.01 M egg lecithin and 1x chemically defined lipid concentrate (Gibco, cat. no.: 11905-031). The HEK293-T culture medium was replaced 5 h post-transfection and lentiviral particles were produced for another 48 h prior to their collection from the supernatant by filtration through a 0.45 µm filter. Viral stocks were stored at -80 °C in aliquots.

**Illumination conditions.** Light intensity was adjusted to 8 µmol m<sup>-2</sup> sec<sup>-1</sup>, for red (660 nm) light illumination and to 80 µmol m<sup>-2</sup> sec<sup>-1</sup> for far-red (740 nm) light illumination. Illumination was performed by custom-made LED arrays and the light intensity was measured, using a quantum

sensor (LI-COR, prod. no.: Q45045). All cell-handling involving the red light-inducible expression systems was done under safe 522 nm light, when PCB was present in the system.

**Reporter gene and biliverdin reductase assay.** The reporter SEAP was quantified in the cell culture medium, using a colorimetric assay as described elsewhere<sup>2</sup> and biliverdin reductase activity was determined using the Biliverdin Reductase Assay Kit (Simga, cat. no.: CS1100)

**Mathematical modeling.** In order to calculate the PCB production rate we used the mathematical model and the experimental data which we published in <sup>3</sup>. To describe the experiments in this study we refined eq. (1) of the model to

$$\frac{d[PCB](t)}{dt} = GD \, k_{synth,PCB} - (k_{deg,PCB,spont} + k_{deg,PCB,ind,BVRA}) [PCB] - k_{form,PPV} [PhyB-VP16] \frac{[PCB]}{K_{m,PCB} + [PCB]} \quad (1)$$

The PCB synthesis rate is described by the newly introduced parameter  $k_{synth,PCB}$ . In this study we used CHO-K1 cells with BVRA knock-down. Therefore the description of the PCB degradation was also refined. The parameter  $k_{deg,PCB,spont}$  models the spontaneous degradation of PCB independent of BVRA. The parameter  $k_{deg,PCB,ind,BVRA}$  describes induced degradation of PCB by BVRA. In cells with BVRA knock-down  $k_{deg,ind,BVRA}$  is around 70 % smaller than in wild type cells (Fig. 2a).

The model was parameterized by performing a multi-experiment fit to the data shown in Supplementary Figure 1 and the data acquired in <sup>3</sup>. The fitting was done by maximizing the likelihood function, see Supplementary Data in <sup>3</sup> for details. The confidence interval of the estimated parameters were obtained by calculating the profile likelihood.<sup>4</sup>

#### Implementation of the experiments

The experiments from <sup>3</sup> were implemented in the same way except for experiment 4 where we introduced an additional offset in the mRNA observation function to describe unspecific bindings in the mRNA measurement:

$$[mRNA_{t,measured}] = \text{offset}_{mRNA} + [mRNA](t).$$

In the experiment shown in Supplementary Figure 1 of this study the cells were incubated for 72 hours in DMEM<sub>complete</sub>. During this time we assumed a slowed cell doubling time of 36 hours ( $k_{growth} = 0.0193 \, h^{-1}$ ). After 72 hours the medium was exchanged. In the new medium HTS<sub>complete</sub> we assumed a cell doubling time of 14 h ( $k_{growth} = 0.0495 \, h^{-1}$ ) like in <sup>3</sup>. Then, increasing concentrations PCB<sub>input</sub> of PCB were added to the medium. This was modeled by a Dirac delta pulse which was approximated by a Gaussian function and was added to the right hand side of eq. (1):

$$[PCB_{input,rate}](t) = PCB_{input} \frac{1}{\sqrt{2\pi\sigma^2}} \exp\left(\frac{-(t-\mu)^2}{2\sigma^2}\right)$$

with  $\mu = 72.04 \text{ h}$  and  $\sigma = 0.03 \text{ h}$ . This leads to a step like increase of the PCB concentration at  $t \approx 72 \text{ h}$ . To model the BVRA knock-down, the induced PCB degradation was decreased by the factor  $k_{BVRA,ko}$

$$k_{deg,ind,BVRA} \rightarrow k_{BVRA,ko} k_{deg,ind,BVRA}.$$

According to Figure 2a we used  $k_{BVRA,ko} = 0.296$ . After 73 hours the system was illuminated with 660 nm light which activated the PCB-PhyB-VP16 complex (PPV). Therefore the light condition was modeled with  $k_{light} = 0$  for  $t < 73 \text{ h}$  and  $k_{light} = 1$  for  $t \geq 73 \text{ h}$ . After 74 hours the light was turned off which means that no more active PCB-PhyB-VP16 (PPV) was produced. We modeled this by setting  $k_{form,PPV} = 0$  for  $t \geq 74 \text{ h}$ . The gene dose was set to  $GD = 1$  at the time point ( $t = 72 \text{ h}$ ) of the medium exchange which corresponds to the experiments in <sup>3</sup>. As observation function we used

$$[SEAP_{measured}] = \text{scale}_{pKM048} N [SEAP].$$

#### Prediction of the total PCB concentration

With the obtained parameters (Supplementary Table 3) we predicted the time course of the total PCB concentration (Fig. 3) by simulating

$$PCB_{total}(t) = N([PCB](t) + [PPV](t)).$$

The 95% confidence interval of the prediction was calculated by propagating the uncertainties of the estimated model parameters to the predicted time course.<sup>5</sup>

## Supplementary Figure 1

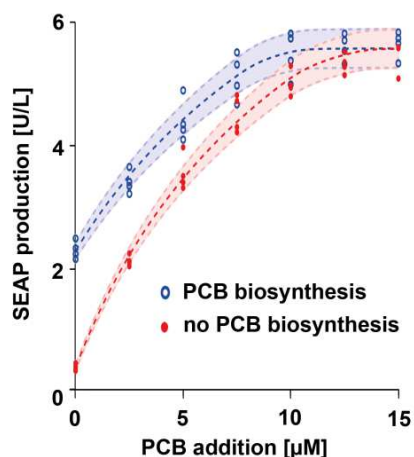

**Quantification of PCB biosynthesis.** Dose-response curves for PCB addition to the culture medium. CHO-K1 cells with  $\text{shRNA}_{\text{BVRA}}$  were transfected for red light-inducible gene expression and for bicistronic expression of the mitochondria targeted PCB biosynthetic genes (blue) or with an empty vector (red). After incubation in the dark in  $\text{DMEM}_{\text{complete}}$  for 72 h the culture medium was replaced with  $\text{HTS}_{\text{complete}}$  containing increasing concentrations of PCB. After incubation in the dark for 1 h, the cells were illuminated with 660 nm light for 1 h followed by incubation in the dark for 23 h and determination of SEAP activity. The curves represent the model fit to the data, and the shaded error bands are estimated by a simple error model with a constant Gaussian error.

Supplementary Table 1.

Expression vectors and oligonucleotides designed and used in this study

| Plasmid               | Description                                                                                                                                                                                                                                                                                                                                                                                                                                                                                                                                                                                                                                     | Ref. or source |
|-----------------------|-------------------------------------------------------------------------------------------------------------------------------------------------------------------------------------------------------------------------------------------------------------------------------------------------------------------------------------------------------------------------------------------------------------------------------------------------------------------------------------------------------------------------------------------------------------------------------------------------------------------------------------------------|----------------|
| pCD/NL-BH*            | HIV-1-derived gag/pol-encoding helper plasmid                                                                                                                                                                                                                                                                                                                                                                                                                                                                                                                                                                                                   | 6              |
| pKM006                | Vector encoding SEAP under the control of a modified P <sub>Tet</sub> harboring a 422 bp spacer between the 13-mer tetO operator and the minimal promoter (tetO <sub>13</sub> -422bp-P <sub>hCMVmin</sub> -SEAP-pA)                                                                                                                                                                                                                                                                                                                                                                                                                             | 3              |
| pKM022                | Bicistronic vector encoding PhyB(1-650)-VP16-NLS and TetR-PIF6(1-100)-HA under control of P <sub>SV40</sub> (P <sub>SV40</sub> -PhyB(1-650)-VP16-NLS-IRES <sub>PV</sub> -TetR-PIF6(1-100)-HA-pA)                                                                                                                                                                                                                                                                                                                                                                                                                                                | 3              |
| pKM048                | Lentiviral vector encoding shRNA <sub>BVRA</sub> under control of P <sub>hU6</sub> (P <sub>hU6</sub> -shRNA <sub>BVRA</sub> -pA)<br>Oligos oKM026 (5'-ccggGCCAAATGTAGGAGTCAATAAActcgagTTATTGACTCCTACATTGGCttttt-3') and oKM027 (5'-aattcaaaaaGCCAAATGTAGGAGTCAATAAActcgagTTATTGACTCCTACATTGGC-3') were annealed and cloned ( <i>AgeI/EcoRI</i> ) into pLKO.1-puro.                                                                                                                                                                                                                                                                              | This work      |
| pKM071                | Plasmid encoding PcyA under control of P <sub>EF1α</sub> (P <sub>EF1α</sub> -tePcyA-pA)<br>Codon-optimized PcyA was chemically synthesized (Supplementary Table 2), digested ( <i>KpnI/EcoRV</i> ) and ligated ( <i>KpnI/EcoRV</i> ) into pWW029.                                                                                                                                                                                                                                                                                                                                                                                               | This work      |
| pKM072                | Plasmid encoding HO1 under control of P <sub>EF1α</sub> (P <sub>EF1α</sub> -teHO1-pA)<br>Codon-optimized HO1 was chemically synthesized (Supplementary Table S2), digested ( <i>KpnI/EcoRV</i> ) and ligated ( <i>KpnI/EcoRV</i> ) into pWW029.                                                                                                                                                                                                                                                                                                                                                                                                 | This work      |
| pKM074                | Plasmid encoding MTS-PcyA under control of P <sub>EF1α</sub> (P <sub>EF1α</sub> -MTS-PcyA-pA)<br>Oligos oKM076 (5'-cGCCACCATGTCCGTCCTGACGCCGCTGCTGCTGCGGGGCTTGACAGGCTCGGCCCCGGCGGCTCCAGTGCCGCGCGCCAAGATCCATTCGTTGggtac-3') and oKM077 (5'-cCAACGAATGGATCTTGGCGCGCGGCACTGGGAGCCGCCGGCCGAGCCTGTCAAGCCCCGAGCAGCAGCGGCGTCAGGACGGACATGGTGGCggtac-3') were annealed and ligated ( <i>KpnI</i> ) into pKM071.                                                                                                                                                                                                                                          | This work      |
| pKM075                | Plasmid encoding MTS-HO1 under control of P <sub>EF1α</sub> (P <sub>EF1α</sub> -MTS-HO1-pA)<br>Oligos oKM076 (5'-cGCCACCATGTCCGTCCTGACGCCGCTGCTGCTGCGGGGCTTGACAGGCTCGGCCCCGGCGGCTCCAGTGCCGCGCGCCAAGATCCATTCGTTGggtac-3') and oKM077 (5'-cCAACGAATGGATCTTGGCGCGCGGCACTGGGAGCCGCCGGCCGAGCCTGTCAAGCCCCGAGCAGCAGCGGCGTCAGGACGGACATGGTGGCggtac-3') were annealed and ligated ( <i>KpnI</i> ) into pKM072.                                                                                                                                                                                                                                            | This work      |
| pKM087                | Bicistronic vector encoding MTS-PcyA and MTS-HO1 under control of P <sub>SV40</sub> (P <sub>SV40</sub> -MTS-PcyA-IRES <sub>PV</sub> -MTS-HO1-pA)<br>IRES <sub>PV</sub> was amplified from pKM022 using oligos oKM086 (5'-gttcaggcgccgcAAGCTTAAACAGCTCTGGGGTTG-3') and oKM087 (5'-gttcagtctagagaattcCAATTCGCTTTATGATAACAATCTGTG-3') and digested ( <i>NotI/EcoRI</i> ), while MTS-teHO1 was amplified from pKM075 using oligos oKM088 (5'-gttcagggaattcGCCACCATGTCCGTCCTG-3') and oKM089 (5'-gttcagtctagaCACTGTGCTGGATATCAAGCTTTC-3') and digested ( <i>EcoRI/XbaI</i> ). Finally, both fragments were ligated ( <i>NotI/XbaI</i> ) into pKM074. | This work      |
| pLKO.1-puro           | Empty lentiviral vector for shRNA expression (P <sub>hU6</sub> -stuffer-pA)                                                                                                                                                                                                                                                                                                                                                                                                                                                                                                                                                                     | 7              |
| pLKO.1-scramble shRNA | Lentiviral vector coding for a random shRNA under control of P <sub>hU6</sub> (P <sub>hU6</sub> -shRNA <sub>scramble</sub> -pA)                                                                                                                                                                                                                                                                                                                                                                                                                                                                                                                 | 8              |
| pLTR-G                | Vector encoding VSV-G under control of 5'LTR (5'LTR-VSV-G-pA)                                                                                                                                                                                                                                                                                                                                                                                                                                                                                                                                                                                   | 9              |
| pMK216                | Vector encoding a P <sub>SV40</sub> -driven PhyB(1-908)-VP16 expression unit (P <sub>SV40</sub> -PhyB(1-908)-VP16-pA)                                                                                                                                                                                                                                                                                                                                                                                                                                                                                                                           | 3              |
| pRSet                 | P <sub>T7</sub> -driven bacterial expression vector                                                                                                                                                                                                                                                                                                                                                                                                                                                                                                                                                                                             | Novagen        |
| pSAM200               | Constitutive TetR-VP16 expression vector (P <sub>SV40</sub> -TetR-VP16-pA)                                                                                                                                                                                                                                                                                                                                                                                                                                                                                                                                                                      | 10             |
| pWW029                | Vector encoding the erythromycin repressor protein E under control of P <sub>EF1α</sub> (P <sub>EF1α</sub> -E-pA)                                                                                                                                                                                                                                                                                                                                                                                                                                                                                                                               | 11             |

HA, human influenza hemagglutinin derived epitope tag; BLVRA, biliverdin reductase A; HO1, heme oxygenase 1 from *Thermosynechococcus elongatus* BP-1; IRES<sub>PV</sub>, polioviral internal ribosome entry site; mEGFP, monomeric version of enhanced green fluorescent protein; MTS, mitochondrial

targeting signal; mYFP, monomeric version of yellow fluorescent protein; NLS, nuclear localization signal from simian virus 40 large T antigen; pA, polyadenylation signal; PcyA, PCB:ferredoxin oxidoreductase from *Thermosynechococcus elongatus* BP-1; P<sub>EF1 $\alpha$</sub> , human elongation factor 1 $\alpha$  promoter; P<sub>hCMV</sub>, human cytomegalovirus immediate early promoter; P<sub>hCMVmin</sub>, minimal human cytomegalovirus immediate early promoter; P<sub>hU6</sub>, human U6 promoter; PhyB, Phytochrome B; PhyB(1-650), N-terminus of Phytochrome B with amino acids 1-650; PhyB(1-908), N-terminus of Phytochrome B with amino acids 1-908; PIF6, Phytochrome-interacting-factor 6; PIF6(1-100), N-terminus of Phytochrome-interacting-factor 6 with amino acids 1-100; P<sub>SV40</sub>, simian virus 40 early promoter; P <sub>$\Delta$ SV40</sub>, truncated simian virus 40 early promoter; P<sub>T5lac</sub>, chimeric promoter for T5 RNA polymerase with the lac operator; P<sub>Tet</sub>, tetracycline-responsive promoter; RBS, ribosome binding site; SEAP, human placental secreted alkaline phosphatase; shRNA, small hairpin RNA; tetO, operator sequence binding TetR; TetR, tetracycline repressor protein; VP16, *Herpes simplex* virus-derived transactivation domain; VSV-G, vesicular stomatitis virus protein G.

Uppercase in oligos, annealing sequence; underlined sequence, restriction site.

Supplementary Table 2.

Nucleotide sequences of chemically synthesized DNA.

| Designation                                                                                                                                            | Nucleotide Sequence                                                                                                                                                                                                                                                                                                                                                                                                                                                                                                                                                                                                                                                                                                                                                                                                                                    |
|--------------------------------------------------------------------------------------------------------------------------------------------------------|--------------------------------------------------------------------------------------------------------------------------------------------------------------------------------------------------------------------------------------------------------------------------------------------------------------------------------------------------------------------------------------------------------------------------------------------------------------------------------------------------------------------------------------------------------------------------------------------------------------------------------------------------------------------------------------------------------------------------------------------------------------------------------------------------------------------------------------------------------|
| H01                                                                                                                                                    | 5' - . . . <u>gcggccgcggtaccgcccacc</u> ATGACAACATCTCTGGCCACCAAGCTGAGAGAGGGCACCAAGAAAGCCCACAC<br>CATGGCCGAGAACGTGGGCTTCGTGCGGTGCTTCCTGAAGGGAACCGTGGAAGTCCCTACCGGAAGCTGGTGGCC<br>TCCCTGTACCACGTGTACTCCGCCATGGAACAGGAAATGGAACGGCTGAAGGACCACCCCATCGTGGGCAAGATCTACT<br>TCCCCGAGCTGAACCGGAAGTCCCTCCCTGGAACGGGACCTGACCTACTACTTCGGCTCCAAGTGGCGGGAAGAGATCCC<br>CCCATCTCCTGCCACCCAGGCTACGTGGCCAGAATCCACGAGGTGGCCAATACCGCCCCTGAGCTGCTGGTGGCTCAC<br>TCCTACACCAGATACCTGGGCGACCTGTCTGGCGGCCAGATTCTGAAGGGCATTGCCGAGCGGGCCATGAACCTGCAGG<br>ATGGCGAGGGCACCGCCTTCTACAGATTGAGTCCATCTCCGACGAGAAGGCCCTTTAAGCAGCTGTACCGGCAGCGGCT<br>GGACGAGCTGCCTGTGGATGAGGCCACCGCCGACAGAATCGTGGACGAGGCCAATGCCGCCTTCGGCATGAACATGAAG<br>ATCTTTCAGGAACTGGAAGGCAACCTGATCCGGGCCATCGGCCAGCTGCTGTTCAACACCCTGACCCGGCGGAAGCAGA<br>GAGGCTCTACCGAGCTGGCCACCGCTGACTGA <u>aagcttgat</u> atc . . . - 3'  |
| PcyA                                                                                                                                                   | 5' - . . . <u>gcggccgcggtaccgcccacc</u> ATGTCTCTGAGACAGCACCAGCACCCCCTGATCCAGAGACTGGCCGACAGAAT<br>CGAGGCCATCTGGCAGGCCTTTTTCCCCCTGGCCCCCTTACGCCCTGCCTGAGGATCTGGGCTACGTGGAAGGCAAGCTG<br>GAAGGCGAGCGGCTGACCATCGAGAACCCTGCTACCAGGCCCTCCATTCCGGAAGCTGCACCTGGAAGTGGCCAGAG<br>TGGGAGAGTCCCTGGACATCCTGCACTGCGTGATGTTCCCCGAGCCCAGATACGACCTGCCCATGTTTCGGCTGCGACCT<br>CGTGGGAGGCAGAGGCCAGATCTCTGCCGCCATCGTGGATCTGTCTCCCGTGACCGGACAGCTGCCTGCCGCTTACACC<br>TGTGCCCTGAATGCCCTGCCCCAAGCTGACCTTCCGGCAGCCCAGAGAAGTGCCTCCTTGGGGCCACATCTTCAGCCCTT<br>TCTGCATCTTCATCCGGCCCCAGGGCGAGGCCGAGGAACAGCAGTTCCTGGATCGGATCGGCGAGTACCTGACCCTGCA<br>CTGTCAGCTGTCCCAGCAGGCCGTGCCTACCGATCATCCACAGGCTGTGATCGCCGGCCAGAGACAGTACTGCCAACAG<br>CAGCAGCAGAACGACAAGACCAGACGGGTGCTGGAAGAGGCCCTTCGGCGTGCCATGGGGCCGAGCGGTATATGACCACCG<br>TGCTGTTTCGACGTGCCCCCGTGTGA <u>aagcttgat</u> atc . . . - 3' |
| Upper case teH01/ tePcyA, underlined sequences in 5' -> 3' direction, restriction sites <i>NotI</i> , <i>KpnI</i> , <i>HindIII</i> ,<br><i>EcoRV</i> . |                                                                                                                                                                                                                                                                                                                                                                                                                                                                                                                                                                                                                                                                                                                                                                                                                                                        |

Supplementary Table 3.

Fitted parameters obtained by a maximum likelihood estimation.

| Parameter                       | $\log_{10}(\theta_{opt,i})$ | $\log_{10}(\sigma^-)$ | $\log_{10}(\sigma^+)$ | Unit                                      |
|---------------------------------|-----------------------------|-----------------------|-----------------------|-------------------------------------------|
| $K_{m,PCB}$                     | 0.000                       | -Inf                  | 0.000 <sup>1</sup>    | $\mu M$                                   |
| $K_{m,tc}$                      | 0.711                       | 0.586                 | 0.846                 | $\mu M$                                   |
| $PhyB-VP16_{total_0}$           | 0.990                       | 0.947                 | 1.038                 | $\mu M$                                   |
| $k_{synth,PCB}$                 | -0.575                      | -0.628                | -0.523                | $\mu M \cdot h^{-1}$                      |
| $k_{basal,mRNA}$                | -1.580                      | -2.007                | -1.378                | $[mRNA](0) \cdot h^{-1}$                  |
| $k_{deg,mRNA}$                  | -0.549                      | -0.618                | -0.478                | $h^{-1}$                                  |
| $k_{deg,PCB,spont}$             | -0.174                      | -0.246                | -0.108                | $h^{-1}$                                  |
| $k_{deg,PCB,ind,BVRA}$          | -1.084                      | -Inf                  | -0.685                | $h^{-1}$                                  |
| $k_{deg,PPV}$                   | -0.823                      | -0.869                | -0.777                | $h^{-1}$                                  |
| $k_{deg,VEGF}$                  | -1.024                      | -1.421                | -0.659                | $h^{-1}$                                  |
| $k_{out}$                       | -0.966                      | -1.411                | -0.643                | $h^{-1}$                                  |
| $k_{tc}$                        | 0.512                       | 0.413                 | 0.613                 | $[mRNA](0) \cdot h^{-1}$                  |
| $k_{tl,P_{pre}}$                | -0.248                      | -0.372                | -0.045                | $ng/ml \cdot [mRNA](0)^{-1} \cdot h^{-1}$ |
| $k_{tl,VEGF}$                   | -0.778                      | -0.932                | -0.682                | $h^{-1}$                                  |
| $k_{tl,SEAP}$                   | -1.980                      | -2.228                | -1.795                | $U/l \cdot (ng/ml)^{-1} \cdot h^{-1}$     |
| offset <sub>stability,PCB</sub> | -0.242                      | -0.260                | -0.226                | 1                                         |
| offset <sub>mRNA</sub>          | -0.262                      | -0.414                | -0.153                | $[mRNA](0)$                               |
| scale <sub>pMK048</sub>         | -0.171                      | -0.194                | -0.147                | 1                                         |
| scale <sub>stability,PCB</sub>  | -1.542                      | -1.579                | -1.504                | $\mu M^{-1}$                              |
| scale <sub>stability,PPV</sub>  | -0.044                      | -0.070                | -0.018                | 1                                         |
| init <sub>P<sub>pre</sub></sub> | 0.000 <sup>2</sup>          |                       |                       | $ng/ml$                                   |
| init <sub>VEGF</sub>            | -1.281                      | -Inf                  | -0.941                | $ng/ml$                                   |
| init <sub>PPV,Exp1</sub>        | -0.367                      | -0.428                | -0.310                | $\mu M$                                   |
| $\sigma_{0,Exp1}$               | -0.755                      | -Inf                  | -0.563                | $U/l$                                     |
| $\sigma_{rel,Ex1}$              | -1.610                      | -Inf                  | -1.121                | 1                                         |
| $\sigma_{0,Exp2}$               | -0.366                      | -0.484                | -0.228                | $U/l$                                     |
| $\sigma_{rel,Exp2}$             | -8.000                      | -Inf                  | -1.250                | 1                                         |
| $\sigma_{0,Exp3}$               | -1.915                      | -Inf                  | -1.613                | 1                                         |
| $\sigma_{rel,Exp3}$             | -8.000                      | -Inf                  | -1.468                | $\mu M^{-1}$                              |
| $\sigma_{0,Exp4}$               | -0.453                      | -0.565                | -0.329                | $[mRNA](0)$                               |
| $\sigma_{rel,Exp4}$             | -0.489                      | -0.630                | -0.338                | 1                                         |

<sup>1</sup> Upper bound of this parameter was set to 1  $\mu M$

<sup>2</sup> Initial concentration of  $P_{pre}$  was fixed to 1, because scale of  $P_{pre}$  is not accessible

|                       |        |        |        |              |
|-----------------------|--------|--------|--------|--------------|
| $\sigma_{0,Exp5}$     | -1.407 | -1.664 | -1.103 | <i>ng/ml</i> |
| $\sigma_{rel,Exp5}$   | -1.104 | -1.181 | -1.019 | 1            |
| $\sigma_{0,pKM048}$   | -1.330 | -1.659 | -0.899 | <i>U/l</i>   |
| $\sigma_{rel,pKM048}$ | -1.246 | -1.350 | -1.151 | 1            |

The parameters are on a log-scale.  $\sigma^-$  and  $\sigma^+$  indicate the 95% point-wise confidence interval on a log-scale obtained by exploiting the profile likelihood. Parameters with the value  $\log_{10}(\theta_{opt,i}) = -8.000$  reached the lower bound of the fitting range and are supposed to be zero. Parameters with an infinite confidence interval are not identifiable.

## Supplementary References

1. B. Mitta, M. Rimann, M. U. Ehrenguber, M. Ehrbar, V. Djonov, J. Kelm and M. Fussenegger, *Nucleic Acids Res*, 2002, **30**, e113.
2. S. Schlatter, M. Rimann, J. Kelm and M. Fussenegger, *Gene*, 2002, **282**, 19-31.
3. K. Muller, R. Engesser, S. Metzger, S. Schulz, M. M. Kampf, M. Busacker, T. Steinberg, P. Tomakidi, M. Ehrbar, F. Nagy, J. Timmer, M. D. Zubriggen and W. Weber, *Nucleic Acids Res*, 2013, **41**, e77.
4. A. Raue, C. Kreutz, T. Maiwald, J. Bachmann, M. Schilling, U. Klingmuller and J. Timmer, *Bioinformatics*, 2009, **25**, 1923-1929.
5. A. Raue, V. Becker, U. Klingmuller and J. Timmer, *Chaos*, 2010, **20**, 045105.
6. H. Mochizuki, J. P. Schwartz, K. Tanaka, R. O. Brady and J. Reiser, *J. Virol.*, 1998, **72**, 8873-8883.
7. S. A. Stewart, D. M. Dykxhoorn, D. Palliser, H. Mizuno, E. Y. Yu, D. S. An, D. M. Sabatini, I. S. Chen, W. C. Hahn, P. A. Sharp, R. A. Weinberg and C. D. Novina, *RNA*, 2003, **9**, 493-501.
8. D. D. Sarbassov, D. A. Guertin, S. M. Ali and D. M. Sabatini, *Science*, 2005, **307**, 1098-1101.
9. J. Reiser, G. Harmison, S. KluepfelStahl, R. O. Brady, S. Karlson and M. Schubert, *Proc. Natl. Acad. Sci. U. S. A.*, 1996, **93**, 15266-15271.
10. M. Fussenegger, S. Moser, X. Mazur and J. E. Bailey, *Biotechnol. Prog.*, 1997, **13**, 733-740.
11. W. Weber, C. Fux, M. Daoud-el Baba, B. Keller, C. C. Weber, B. P. Kramer, C. Heinzen, D. Aubel, J. E. Bailey and M. Fussenegger, *Nat. Biotechnol.*, 2002, **20**, 901-907.
